# Supplementary material
Source: Elsevier journal article supplement (https://www.sciencedirect.com/science/article/pii/S1575181321000383)
Supplement: mmc1 [file S1575181321000383:mmc1.pdf]

## Material Suplementario

### Anexo 1

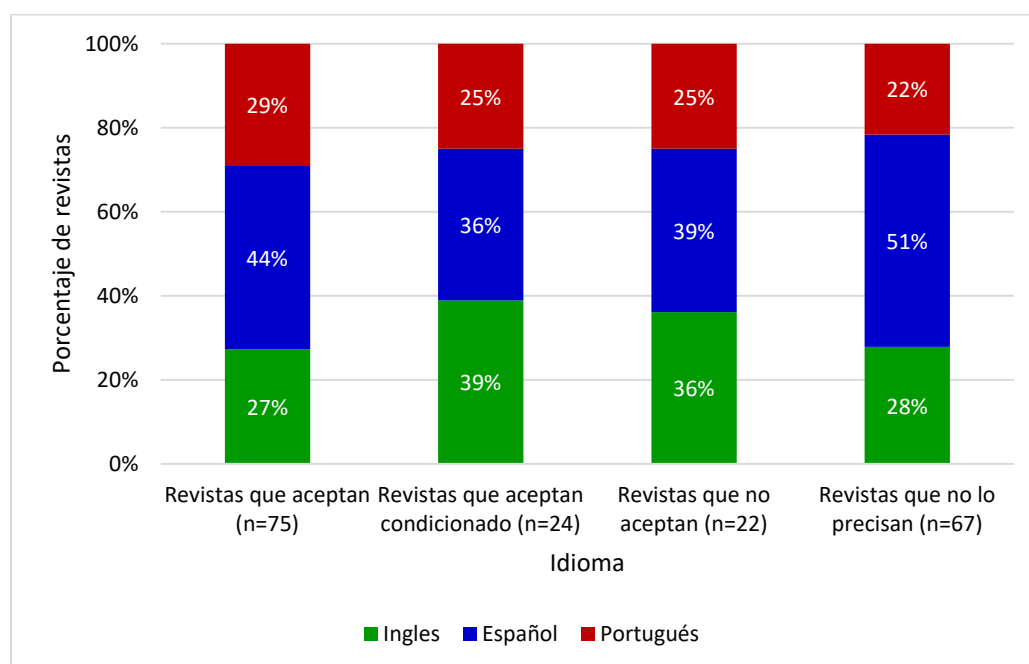

\*Se consideró el total de idiomas consignado en las directrices de publicación de las revistas seleccionadas.

Figura S1. Accesibilidad de publicación estudiantil, según idioma de publicación de revistas médicas de Latinoamérica indizadas a *Scimago Journal & Country Rank* (SJR).
